# Supplementary material for: A “turn on” fluorescent and chromogenic chemosensor for fluoride anion: experimental and DFT studies
Source: Royal Society of Chemistry journal article supplement (doi:10.1039/c6qi00033a), 2016-01-01
Supplement: c6qi00033a2.pdf [file c6qi00033a2.pdf]

### Supporting Information

#### **A “turn on” fluorescent and chromogenic chemosensor for fluoride anion: Experimental and DFT study.**

Pranila B. Thale<sup>†a</sup>, Pravin N. Borase<sup>†a</sup> and Dr. Ganapati S. Shankarling<sup>\*a</sup>.

<sup>a</sup>Dyestuff Technology Department, Institute of Chemical Technology, Mumbai 400019, India.

Corresponding author: Tel: 91-22-33612708, Fax: +91-22-33611020, E-mail address: [gsshankarling@gmail.com](mailto:gsshankarling@gmail.com)

#### **1. Determination the binding constant**

For 1:2 binding constant: The binding of two guests ( $F^-$ ) to single host molecule (BTA) gives two binding constants ( $K_1$  and  $K_2$ ). These values we have obtained by fitting the equation 12 into Origin software program according to literature reported method<sup>1</sup>.

For 1:2 binding, we have two equilibrium equations (Eqn (1),(2)), two binding constant expression (eqn (3), (4)) and two mass balance equation (eqn (5), (6)).

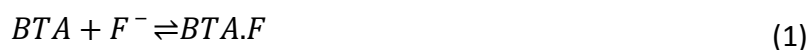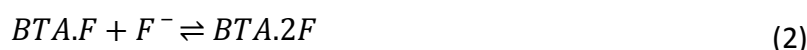

$$K_1 = [BTA.F]/([BTA][F^-]) \quad (3)$$

$$K_2 = [BTA.2F]/([BTA.F][F^-]) \quad (4)$$

$$[BTA]_t = [BTA] + [BTA.F] + [BTA.2F] \quad (5)$$

$$[F^-]_t = [F^-] + [BTA.F] + 2[BTA.2F] \quad (6)$$

Equation (3)-(5) are combined to give equation (7)-(9)

$$[BTA] = \frac{[BTA]_t}{1 + K_1[F^-] + K_1K_2[F^-]^2} \quad (7)$$

$$[BTA.F] = \frac{K_1[F^-][BTA]_t}{1 + K_1[F^-] + K_1K_2[F^-]^2} \quad (8)$$

$$[BTA.2F] = \frac{K_1K_2[F^-]^2[BTA]_t}{1 + K_1[F^-] + K_1K_2[F^-]^2} \quad (9)$$

According to Beers lamberts law, we have obtained equation 10.

$$A = \varepsilon_{BTA} b[BTA] + \varepsilon_{F^-} b[F^-] + \varepsilon_{BTA.F} b[BTA.F] + \varepsilon_{BTA.2F} b[BTA.2F] \quad (10)$$

The receptor BTA has an absorbance at 385 nm and the F<sup>-</sup> anion is transparent at this wavelength. The UV-visible titration is performed by keeping the  $[BTA]_t$  constant with an incremental addition of  $[F^-]$ . As a result, equation 10 can be simplified to equation 11. By substituting the equation (7)-(9) into the equation 11; equation 12 is obtained in which absorbance is dependent on the anion concentration.

$$A = \varepsilon_{BTA} b[BTA] + \varepsilon_{BTA.F} b[BTA.F] + \varepsilon_{BTA.2F} b[BTA.2F] \quad (11)$$

$$A = \frac{\varepsilon_{BTA} b + \varepsilon_{BTA.F} b K_1 [F^-] + \varepsilon_{BTA.2F} b K_1 K_2 [F^-]^2}{1 + K_1 [F^-] + K_1 K_2 [F^-]^2} [BTA]_t \quad (12)$$

By fitting this equation by iterative data fitting procedure in the origin software, we have obtained  $K_1$  and  $K_2$  48.36 M<sup>-1</sup> and 1.578 × 10<sup>7</sup> M<sup>-1</sup> respectively.

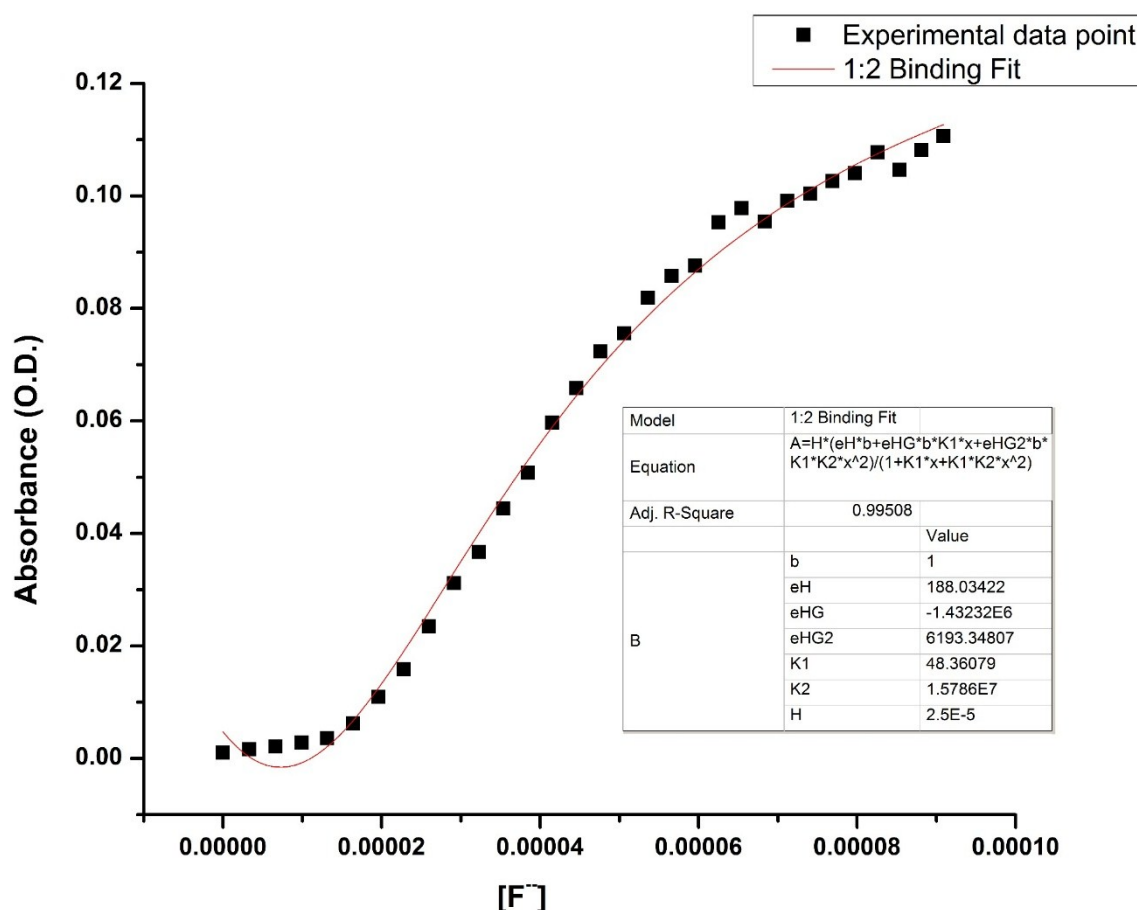

**Figure S1:** Graph of absorbance at 488nm v/s fluoride anion concentration obtained by iterative data fitting procedure in the origin software.

## 2. Calculation of detection limit

The detection limit was calculated based on the UV-spectrophotometric titration data. A good linear relationship between the absorbance ( $\Delta A$ ) and the  $[F^-]$  concentration could be

obtained. The absorbance of BTA without anion  $[F^-]$  was measured 10 times and the standard deviation of blank measurements was determined. The detection limit was calculated by using this equation ( $3\sigma/S$ ), where  $\sigma$  = standard deviation of BTA absorbance,  $S$ = slope between the absorbance versus  $[F^-]$  concentration. The limit of detection for  $[F^-]$  was  $4.1 \times 10^{-7}$  M.

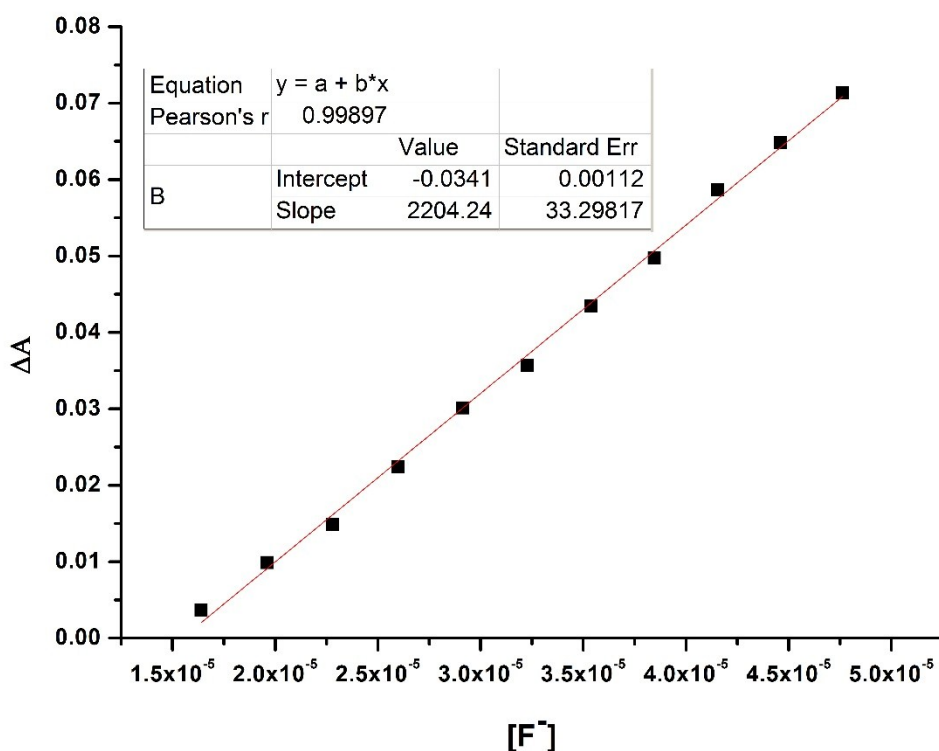

**Figure S2:** Absorbance at 488 nm for BTA (25  $\mu$ M in acetonitrile) as a function of the concentration of  $F^-$  ion. The lowest detection limit is  $4.1 \times 10^{-7}$  M.

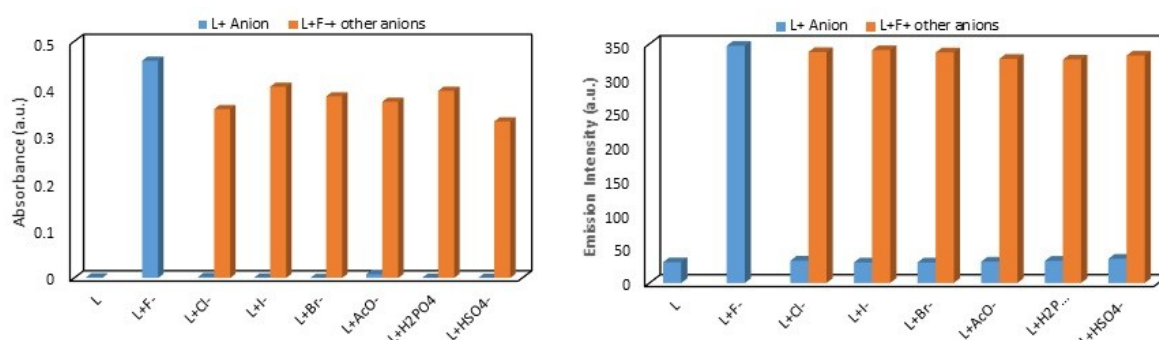

**Figure S3:** Interference plots of **BTA** with  $F^-$  ion in the presence of other anions. Competitive binding experiments.

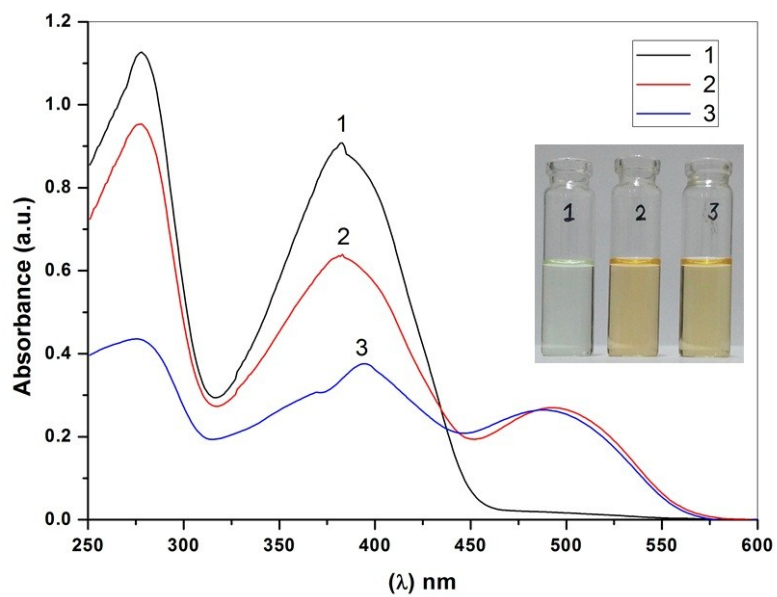

**Figure S4:** Absorption spectra of (1) L (BTA) in acetonitrile (2) L+F<sup>-</sup> in acetonitrile (3) L+F<sup>-</sup> in acetonitrile containing 5% water.

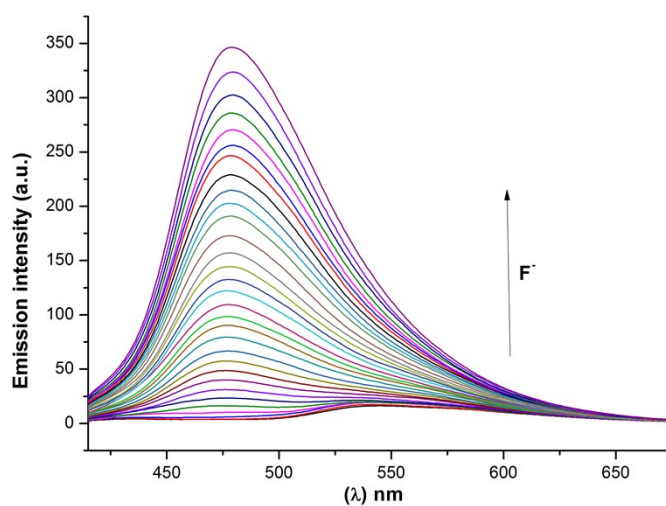

**Figure S5:** Emission titration plot of receptor BTA (25 μM) with increasing F<sup>-</sup> (1mM) ion concentration (0 to 300 μL) in acetonitrile (λ<sub>ex</sub> = 385 nm).

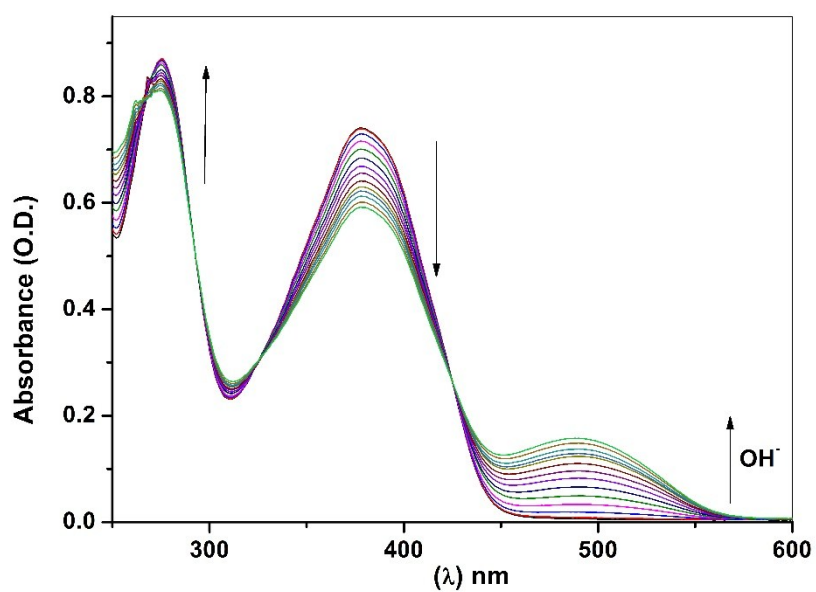

**Figure S6:** Changes in absorption spectra of L (25 $\mu$ M) upon addition of TBAOH (1mM) in acetonitrile.

**Table S1:** Data of comparison with other reported receptors.

| Sr. No. | Receptors                                                                           | Anion detected                                                                    | Binding constant ( $M^{-1}$ )                               | Detection limit (M)                                                    | Reference |
|---------|-------------------------------------------------------------------------------------|-----------------------------------------------------------------------------------|-------------------------------------------------------------|------------------------------------------------------------------------|-----------|
| 1       | 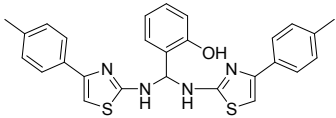 | F <sup>-</sup>                                                                    | $5.4 \times 10^4$                                           | $4.1 \times 10^{-7}$                                                   | This work |
| 2       |  | F <sup>-</sup><br>AcO <sup>-</sup>                                                | $7.3 \times 10^3$<br>$3.5 \times 10^3$                      | NA<br>NA                                                               | [2]       |
| 3       |  | F <sup>-</sup><br>AcO <sup>-</sup><br>H <sub>2</sub> PO <sub>4</sub> <sup>-</sup> | $2.0 \times 10^4$<br>$2.2 \times 10^4$<br>$9.6 \times 10^3$ | $1.2 \times 10^{-6}$<br>$1.23 \times 10^{-6}$<br>$3.20 \times 10^{-6}$ | [3]       |
| 4       |  | F <sup>-</sup><br>AcO <sup>-</sup>                                                | $3.43 \times 10^4$<br>NA                                    | $1.21 \times 10^{-6}$<br>NA                                            | [4]       |

|   |                                                                                   |                                                                                   |                                                                |                |     |
|---|-----------------------------------------------------------------------------------|-----------------------------------------------------------------------------------|----------------------------------------------------------------|----------------|-----|
| 5 | 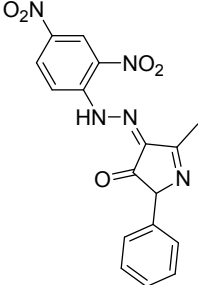 | F <sup>-</sup><br>AcO <sup>-</sup><br>H <sub>2</sub> PO <sub>4</sub> <sup>-</sup> | $5.40 \times 10^4$<br>$4.73 \times 10^3$<br>$2.57 \times 10^3$ | NA<br>NA<br>NA | [5] |
| 6 |  | F <sup>-</sup><br>AcO <sup>-</sup><br>H <sub>2</sub> PO <sub>4</sub> <sup>-</sup> | $7.76 \times 10^4$<br>$6.24 \times 10^3$<br>NA                 | NA<br>NA<br>NA | [6] |

Note N.A.= Not available

### Natural bond orbital analysis (NBO):

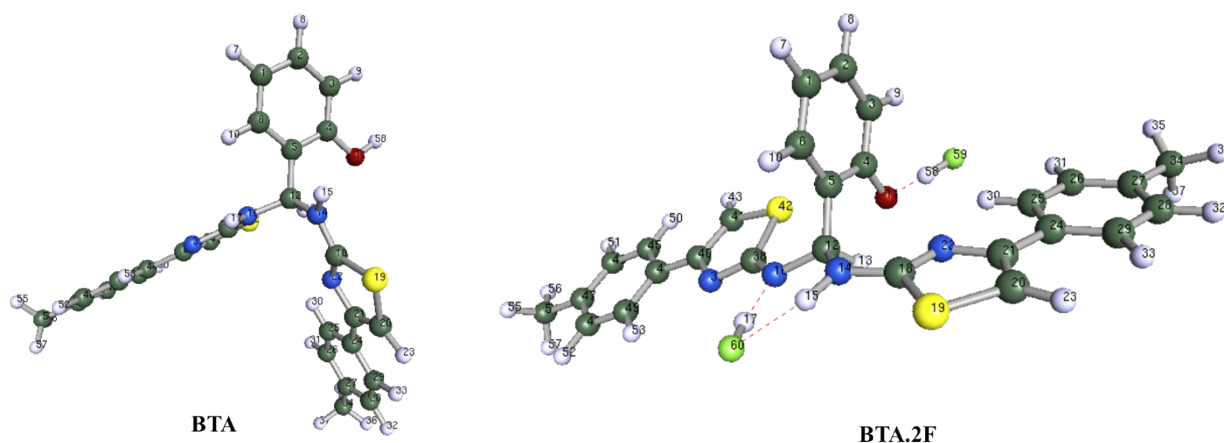

**Figure S7:** Geometry optimised structure of BTA, BTA.2F<sup>-</sup>.

**Table S2:** Summary of Natural population analysis of BTA.

| No | Atom | Natural charge | Natural population |         |         |         |
|----|------|----------------|--------------------|---------|---------|---------|
|    |      |                | Core               | Valence | Rydberg | Total   |
| 1  | c    | -0.2495        | 1.99894            | 4.23396 | 0.01659 | 6.2495  |
| 2  | c    | -0.20148       | 1.99896            | 4.18649 | 0.01603 | 6.20148 |
| 3  | c    | -0.29416       | 1.9989             | 4.27859 | 0.01667 | 6.29416 |
| 4  | c    | 0.35999        | 1.99857            | 3.61763 | 0.0238  | 5.64001 |
| 5  | c    | -0.13489       | 1.99878            | 4.11732 | 0.01879 | 6.13489 |
| 6  | c    | -0.19739       | 1.99891            | 4.18221 | 0.01628 | 6.19739 |
| 7  | h    | 0.22955        | 0                  | 0.76884 | 0.00161 | 0.77045 |
| 8  | h    | 0.23108        | 0                  | 0.76725 | 0.00168 | 0.76892 |
| 9  | h    | 0.23371        | 0                  | 0.76451 | 0.00178 | 0.76629 |
| 10 | h    | 0.23108        | 0                  | 0.76653 | 0.00239 | 0.76892 |
| 11 | o    | -0.69271       | 1.9997             | 6.68303 | 0.00998 | 8.69271 |

|       |   |          |          |          |         |          |
|-------|---|----------|----------|----------|---------|----------|
| 12    | c | 0.16535  | 1.99901  | 3.80299  | 0.03265 | 5.83465  |
| 13    | h | 0.24706  | 0        | 0.74707  | 0.00587 | 0.75294  |
| 14    | n | -0.64779 | 1.9991   | 5.63367  | 0.01502 | 7.64779  |
| 15    | h | 0.42426  | 0        | 0.57294  | 0.0028  | 0.57574  |
| 16    | n | -0.652   | 1.9991   | 5.63692  | 0.01597 | 7.652    |
| 17    | h | 0.42562  | 0        | 0.57016  | 0.00422 | 0.57438  |
| 18    | c | 0.3384   | 1.99912  | 3.62524  | 0.03725 | 5.6616   |
| 19    | s | 0.32675  | 9.99888  | 5.63724  | 0.03713 | 15.67325 |
| 20    | c | -0.4248  | 1.99894  | 4.40863  | 0.01723 | 6.4248   |
| 21    | c | 0.13976  | 1.99885  | 3.8344   | 0.02699 | 5.86024  |
| 22    | n | -0.60258 | 1.99917  | 5.58611  | 0.01729 | 7.60258  |
| 23    | h | 0.25577  | 0        | 0.74328  | 0.00096 | 0.74423  |
| 24    | c | -0.09178 | 1.99884  | 4.0762   | 0.01674 | 6.09178  |
| 25    | c | -0.19607 | 1.99894  | 4.18066  | 0.01648 | 6.19607  |
| 26    | c | -0.21701 | 1.99889  | 4.20217  | 0.01595 | 6.21701  |
| 27    | c | -0.04342 | 1.99886  | 4.02923  | 0.01533 | 6.04342  |
| 28    | c | -0.21808 | 1.99889  | 4.20311  | 0.01607 | 6.21808  |
| 29    | c | -0.19444 | 1.99894  | 4.18009  | 0.01541 | 6.19444  |
| 30    | h | 0.23308  | 0        | 0.76338  | 0.00355 | 0.76692  |
| 31    | h | 0.22393  | 0        | 0.77426  | 0.00181 | 0.77607  |
| 32    | h | 0.22502  | 0        | 0.7732   | 0.00177 | 0.77498  |
| 33    | h | 0.22363  | 0        | 0.77442  | 0.00195 | 0.77637  |
| 34    | c | -0.61589 | 1.99924  | 4.60687  | 0.00978 | 6.61589  |
| 35    | h | 0.22072  | 0        | 0.77787  | 0.00141 | 0.77928  |
| 36    | h | 0.2185   | 0        | 0.78013  | 0.00137 | 0.7815   |
| 37    | h | 0.22576  | 0        | 0.77274  | 0.0015  | 0.77424  |
| 38    | c | 0.34257  | 1.99913  | 3.62028  | 0.03802 | 5.65743  |
| 39    | n | -0.60999 | 1.99918  | 5.59257  | 0.01823 | 7.60999  |
| 40    | c | 0.14048  | 1.99885  | 3.83326  | 0.02741 | 5.85952  |
| 41    | c | -0.42988 | 1.99894  | 4.41399  | 0.01695 | 6.42988  |
| 42    | s | 0.30964  | 9.99885  | 5.65482  | 0.03668 | 15.69036 |
| 43    | h | 0.25449  | 0        | 0.74452  | 0.00099 | 0.74551  |
| 44    | c | -0.0909  | 1.99884  | 4.07529  | 0.01677 | 6.0909   |
| 45    | c | -0.19464 | 1.99893  | 4.18024  | 0.01547 | 6.19464  |
| 46    | c | -0.21926 | 1.99889  | 4.2043   | 0.01607 | 6.21926  |
| 47    | c | -0.04376 | 1.99886  | 4.0295   | 0.01539 | 6.04376  |
| 48    | c | -0.21593 | 1.99889  | 4.201    | 0.01604 | 6.21593  |
| 49    | c | -0.19613 | 1.99894  | 4.18072  | 0.01646 | 6.19613  |
| 50    | h | 0.22348  | 0        | 0.77459  | 0.00193 | 0.77652  |
| 51    | h | 0.22486  | 0        | 0.77338  | 0.00176 | 0.77514  |
| 52    | h | 0.22381  | 0        | 0.77437  | 0.00182 | 0.77619  |
| 53    | h | 0.23345  | 0        | 0.76355  | 0.003   | 0.76655  |
| 54    | c | -0.61605 | 1.99924  | 4.60703  | 0.00979 | 6.61605  |
| 55    | h | 0.22438  | 0        | 0.77416  | 0.00147 | 0.77562  |
| 56    | h | 0.2168   | 0        | 0.78185  | 0.00135 | 0.7832   |
| 57    | h | 0.2235   | 0        | 0.77505  | 0.00145 | 0.7765   |
| 58    | h | 0.49403  | 0        | 0.50483  | 0.00114 | 0.50597  |
| Total |   | 0        | 83.96507 | 169.3186 | 0.7163  | 254      |

Table S3: Summary of Natural population analysis of BTA.2F complex.

| No | Atom | Natural charge | Natural population |         |         |          |
|----|------|----------------|--------------------|---------|---------|----------|
|    |      |                | Core               | Valence | Rydberg | Total    |
| 1  | c    | -0.19702       | 1.99896            | 4.18155 | 0.01651 | 6.19702  |
| 2  | c    | -0.20318       | 1.99896            | 4.18823 | 0.01598 | 6.20318  |
| 3  | c    | -0.26007       | 1.99889            | 4.24342 | 0.01776 | 6.26007  |
| 4  | c    | 0.41154        | 1.99877            | 3.55486 | 0.03482 | 5.58846  |
| 5  | c    | -0.13596       | 1.99882            | 4.11467 | 0.02247 | 6.13596  |
| 6  | c    | -0.196         | 1.99886            | 4.17974 | 0.0174  | 6.196    |
| 7  | h    | 0.2329         | 0                  | 0.76551 | 0.00159 | 0.7671   |
| 8  | h    | 0.23466        | 0                  | 0.76357 | 0.00176 | 0.76534  |
| 9  | h    | 0.23277        | 0                  | 0.76119 | 0.00604 | 0.76723  |
| 10 | h    | 0.23597        | 0                  | 0.76147 | 0.00256 | 0.76403  |
| 11 | o    | -0.71149       | 1.99971            | 6.70201 | 0.00977 | 8.71149  |
| 12 | c    | 0.14032        | 1.99895            | 3.82703 | 0.0337  | 5.85968  |
| 13 | h    | 0.28723        | 0                  | 0.70709 | 0.00568 | 0.71277  |
| 14 | n    | -0.65297       | 1.9991             | 5.63864 | 0.01523 | 7.65297  |
| 15 | h    | 0.42439        | 0                  | 0.56702 | 0.0086  | 0.57561  |
| 16 | n    | -0.51806       | 1.99909            | 5.49538 | 0.02359 | 7.51806  |
| 17 | h    | 0.54272        | 0                  | 0.45239 | 0.00489 | 0.45728  |
| 18 | c    | 0.33122        | 1.99911            | 3.63277 | 0.0369  | 5.66878  |
| 19 | s    | 0.33327        | 9.99888            | 5.63066 | 0.03719 | 15.66673 |
| 20 | c    | -0.42381       | 1.99894            | 4.40757 | 0.0173  | 6.42381  |
| 21 | c    | 0.14513        | 1.99886            | 3.82899 | 0.02703 | 5.85487  |
| 22 | n    | -0.59963       | 1.99917            | 5.58274 | 0.01773 | 7.59963  |
| 23 | h    | 0.25611        | 0                  | 0.74295 | 0.00093 | 0.74389  |
| 24 | c    | -0.09428       | 1.99884            | 4.07865 | 0.0168  | 6.09428  |
| 25 | c    | -0.19255       | 1.99893            | 4.17613 | 0.01749 | 6.19255  |
| 26 | c    | -0.21719       | 1.99888            | 4.20136 | 0.01694 | 6.21719  |
| 27 | c    | -0.04245       | 1.99886            | 4.02828 | 0.01531 | 6.04245  |
| 28 | c    | -0.22042       | 1.99889            | 4.20545 | 0.01608 | 6.22042  |
| 29 | c    | -0.19527       | 1.99894            | 4.18088 | 0.01546 | 6.19527  |
| 30 | h    | 0.23422        | 0                  | 0.75923 | 0.00656 | 0.76578  |
| 31 | h    | 0.2251         | 0                  | 0.77073 | 0.00417 | 0.7749   |
| 32 | h    | 0.2242         | 0                  | 0.77401 | 0.00178 | 0.7758   |
| 33 | h    | 0.22313        | 0                  | 0.77495 | 0.00192 | 0.77687  |
| 34 | c    | -0.61551       | 1.99924            | 4.60649 | 0.00978 | 6.61551  |
| 35 | h    | 0.22067        | 0                  | 0.77792 | 0.00141 | 0.77933  |
| 36 | h    | 0.21748        | 0                  | 0.78113 | 0.00139 | 0.78252  |
| 37 | h    | 0.22541        | 0                  | 0.7731  | 0.00149 | 0.77459  |
| 38 | c    | 0.4015         | 1.99904            | 3.55932 | 0.04013 | 5.5985   |
| 39 | n    | -0.52039       | 1.99915            | 5.50262 | 0.01861 | 7.52039  |
| 40 | c    | 0.25323        | 1.99892            | 3.71915 | 0.0287  | 5.74677  |
| 41 | c    | -0.32628       | 1.99912            | 4.30799 | 0.01917 | 6.32628  |
| 42 | s    | 0.52583        | 9.99877            | 5.43249 | 0.04291 | 15.47417 |
| 43 | h    | 0.28155        | 0                  | 0.71729 | 0.00116 | 0.71845  |



|       |   |          |          |          |         |         |
|-------|---|----------|----------|----------|---------|---------|
| 44    | c | -0.11141 | 1.99884  | 4.09567  | 0.01689 | 6.11141 |
| 45    | c | -0.15475 | 1.99894  | 4.14025  | 0.01556 | 6.15475 |
| 46    | c | -0.21593 | 1.99889  | 4.20082  | 0.01622 | 6.21593 |
| 47    | c | 0.01354  | 1.99888  | 3.97236  | 0.01522 | 5.98646 |
| 48    | c | -0.20629 | 1.99889  | 4.19129  | 0.01612 | 6.20629 |
| 49    | c | -0.154   | 1.99895  | 4.13859  | 0.01646 | 6.154   |
| 50    | h | 0.23336  | 0        | 0.76459  | 0.00205 | 0.76664 |
| 51    | h | 0.23665  | 0        | 0.76169  | 0.00166 | 0.76335 |
| 52    | h | 0.2357   | 0        | 0.76258  | 0.00172 | 0.7643  |
| 53    | h | 0.24478  | 0        | 0.75287  | 0.00235 | 0.75522 |
| 54    | c | -0.62175 | 1.99923  | 4.61247  | 0.01005 | 6.62175 |
| 55    | h | 0.23566  | 0        | 0.76301  | 0.00133 | 0.76434 |
| 56    | h | 0.22321  | 0        | 0.77553  | 0.00126 | 0.77679 |
| 57    | h | 0.23419  | 0        | 0.76448  | 0.00132 | 0.76581 |
| 58    | h | 0.53846  | 0        | 0.45678  | 0.00476 | 0.46154 |
| 59    | f | -0.63917 | 1.99996  | 7.63559  | 0.00362 | 9.63917 |
| 60    | f | -0.61028 | 1.99995  | 7.60625  | 0.00407 | 9.61028 |
| Total |   | 0        | 87.96518 | 183.2515 | 0.78337 | 272     |

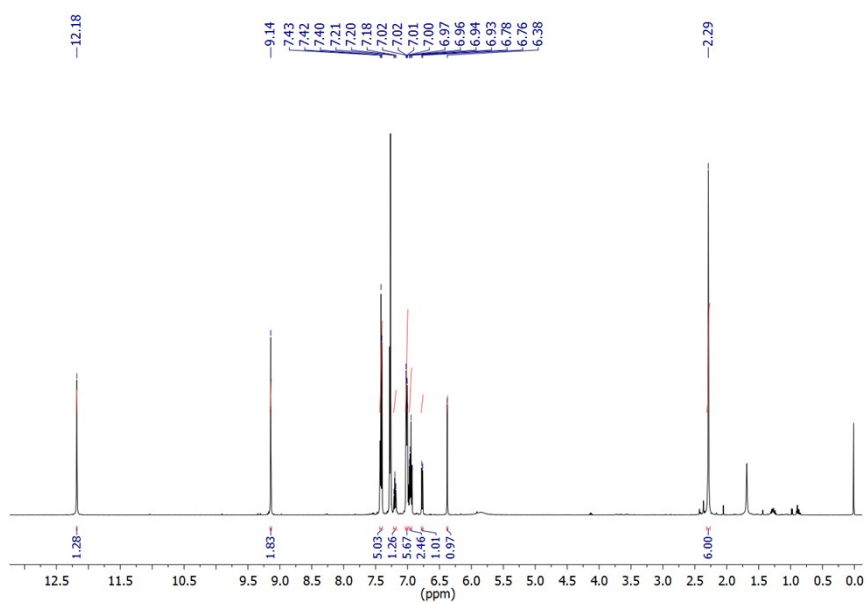

**Figure S8:** <sup>1</sup>H NMR of 2-(bis((4-(p-tolyl)thiazol-2-yl)amino)methyl)phenol (BTA).

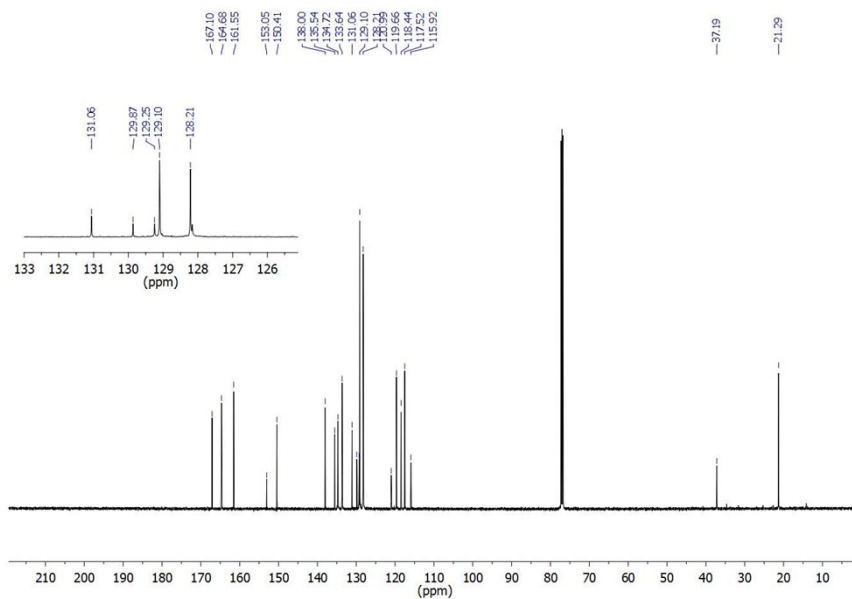

**Figure S9:**  $^{13}\text{C}$  of 2-(bis((4-(p-tolyl)thiazol-2-yl)amino)methyl)phenol (**BTA**).

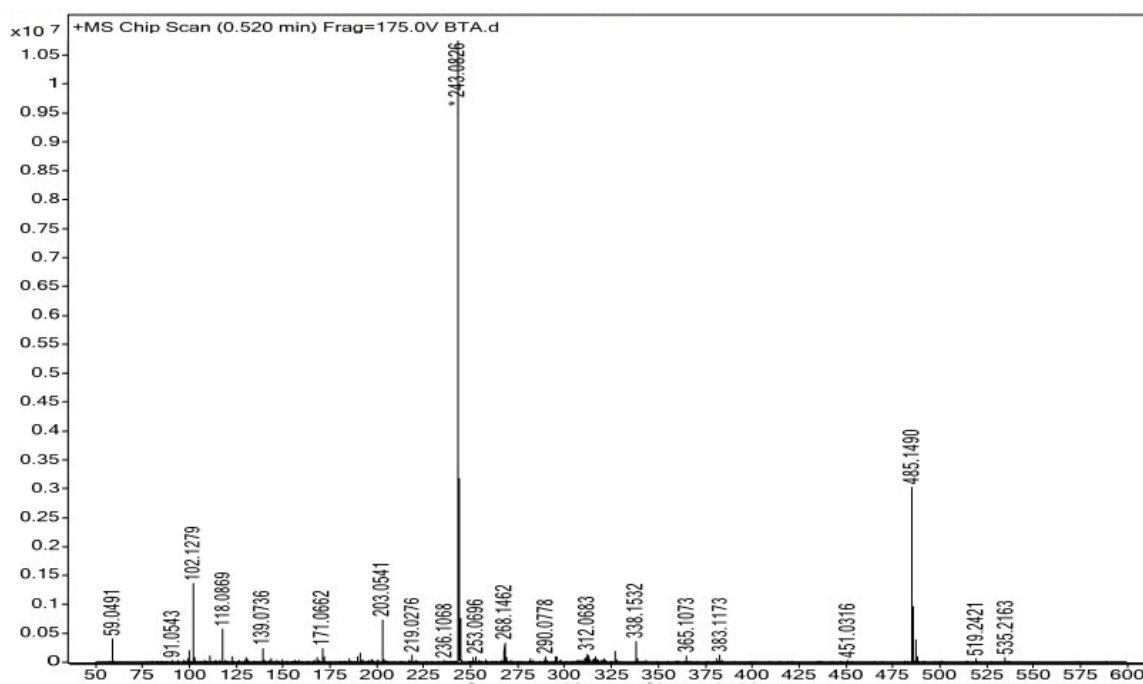

**Figure S10:** HRMS (ESI-QTOF) spectra of **BTA**.

#### References:

1. A. E. Hargrove, Z. Zhong, J. L. Sessler, and E. V. Anslyn, *New J. Chem.*, 2010, **34**, 348.
2. M. Zhang, M. Li, F. Li, Y. Cheng, J. Zhang, T. Yi, and C. Huang, *Dye. Pigment.*, 2008, **77**, 408–414.
3. Y. M. Hijji, B. Barare, A. P. Kennedy, and R. Butcher, *Sensors Actuators, B Chem.*, 2009, **136**, 297–302.
4. A. K. Mahapatra, R. Maji, K. Maiti, S. S. Adhikari, C. Das Mukhopadhyay, and D. Mandal, *Analyst*, 2014, **139**, 309–17.

5. J. Shao, X. Yu, H. Lin, and H. Lin, *J. Mol. Recognit.*, 2008, **21**, 425–430.
6. D. Sharma, S. K. Sahoo, R. K. Bera, and R. Kamal, *J. Fluoresc.*, 2013, **23**, 387–392.
